# Supplementary material
Source: PubMed Central journal article supplement (PMC3957430)
Supplement: NIHMS559926-supplement-Permission_from_Wu.pdf [file NIHMS559926-supplement-Permission_from_Wu.pdf]

Acknowledgment Permission Form

Journal Stroke  
Manuscript No. STROKE/2013/002491R2  
First author LENG Xinyi  
Title of work Evaluating Intracranial Atherosclerosis Rather Than Intracranial Stenosis

Acknowledgment Permission:

Authors must provide written permission/approval from all individuals mentioned by name in the Acknowledgements section of a submitted manuscript. By signing this form, any and all acknowledged persons therefore state that they have read and approved the mention of their names in the Acknowledgment section of the aforementioned paper.

Printed Name XU Weihai

Signature XU Weihai 徐卫海

Date Dec. 10. 2013

I agree to be identified in the Acknowledgements section and legend of Figure 1 in the aforementioned manuscript for my contribution to its preparation.

Prof. XU Weihai,  
Department of Neurology,  
Peking Union Medical College Hospital,  
Beijing, China

Signature: 徐卫海  
Date: 2013年12月10日
